# Supplementary material
Source: PubMed Central journal article supplement (PMC5278182)
Supplement: IAI.00808-16_zii999091956s1.pdf [file IAI.00808-16_zii999091956s1.pdf]

**Fig S1: Coinfection provides only a modest advantage to any individual strain.** Urine, bladder, kidney, and spleen homogenates from all mice were plated on LB agar to determine total CFU/gram tissue or ml urine), as well as LB agar supplemented with 20  $\mu\text{g/ml}$  chloramphenicol to differentiate between *P. mirabilis* and *P. stuartii*. A coinfection index was calculated as follows for all samples in which bacterial burden was above the limit of detection:

$$\text{COI} = \frac{P. \textit{stuartii} \text{ CFUs from coinfecting mouse} / P. \textit{mirabilis} \text{ CFUs from coinfecting mouse}}{\text{Median } P. \textit{stuartii} \text{ CFUs from single infection} / \text{Median } P. \textit{mirabilis} \text{ CFUs from single infection}}$$

$\text{Log}_{10}\text{COI}=0$  indicates that the ratio of *P. stuartii* to *P. mirabilis* (or their respective urease mutants) from coinfecting mice is the same as the ratio when comparing the median CFUs from single species infections.  $\text{Log}_{10}\text{COI}>0$  indicates that the ratio favors *P. stuartii* either because *P. stuartii* colonized to a higher level during coinfection than single species infection, *P. mirabilis* colonized at a lower level than during single species infection, or some combination thereof.  $\text{Log}_{10}\text{COI}<0$  indicates that the ratio favored *P. mirabilis*. (A and E) Urine COI, (B and F) bladder COI, (C and G) kidney COI, (D and H) spleen COI. Each symbol represents the COI for one mouse. Lines represent the median for a minimum of two independent experiments, at least five mice per infection group (total N of 11-23 per infection group). Dashed line indicates  $\text{Log}_{10}\text{COI}=0$ . \* $P<0.05$ , \*\* $P<0.01$ , \*\*\* $P<0.001$  by Wilcoxon signed-rank test.

# Ascending UTI

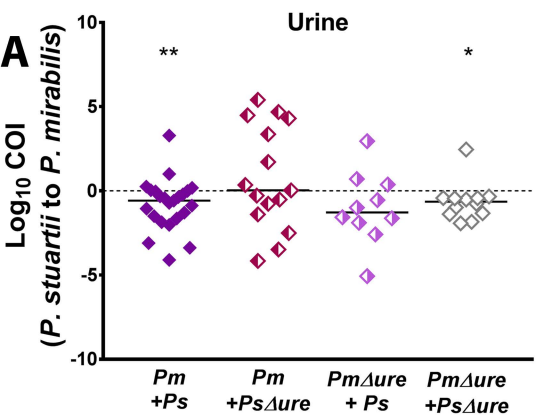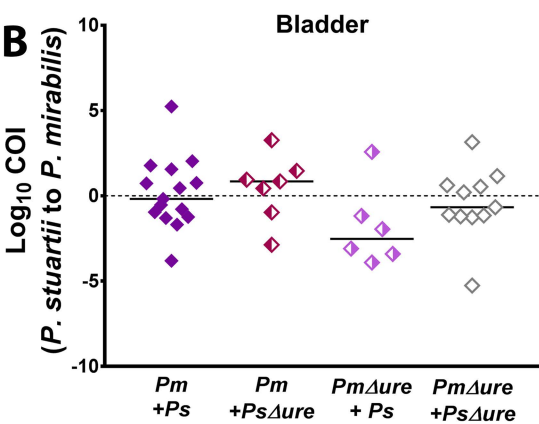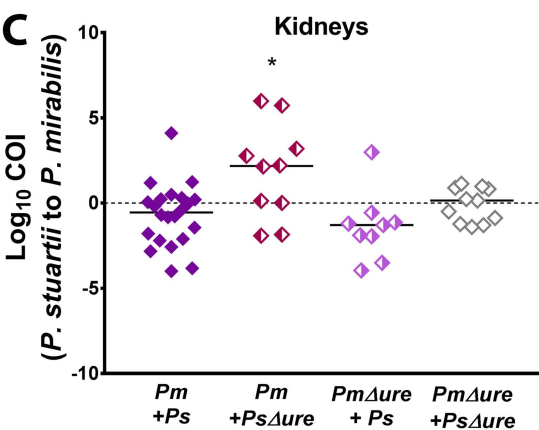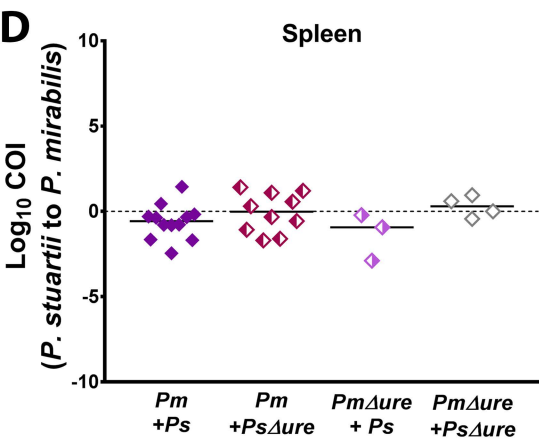

# CAUTI

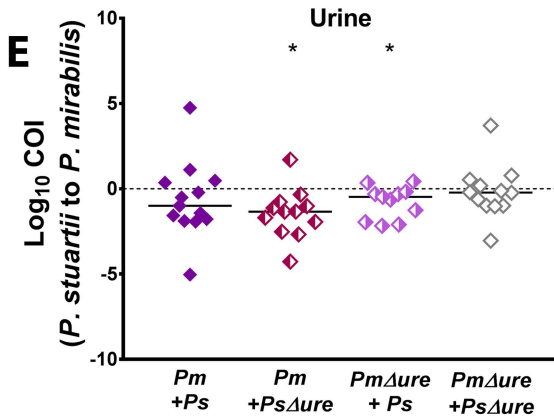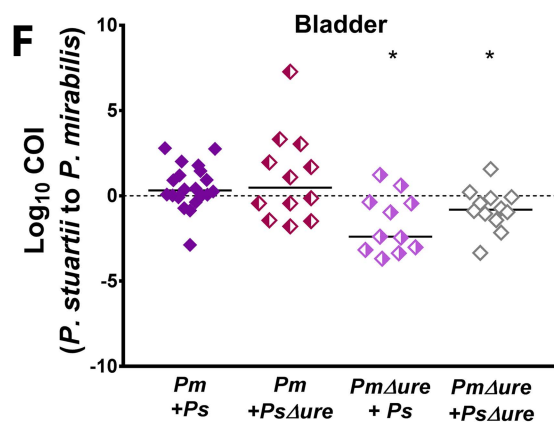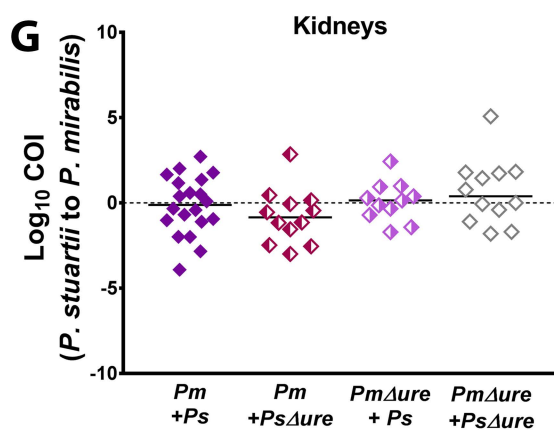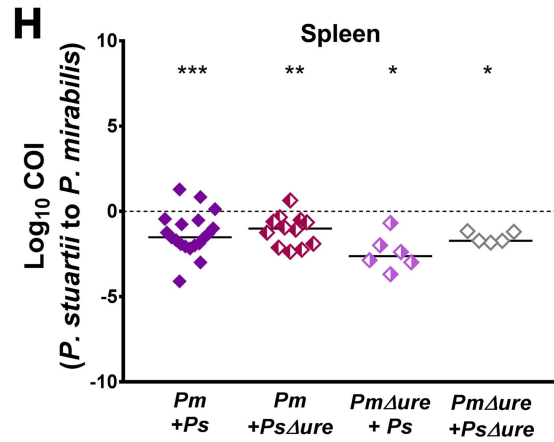

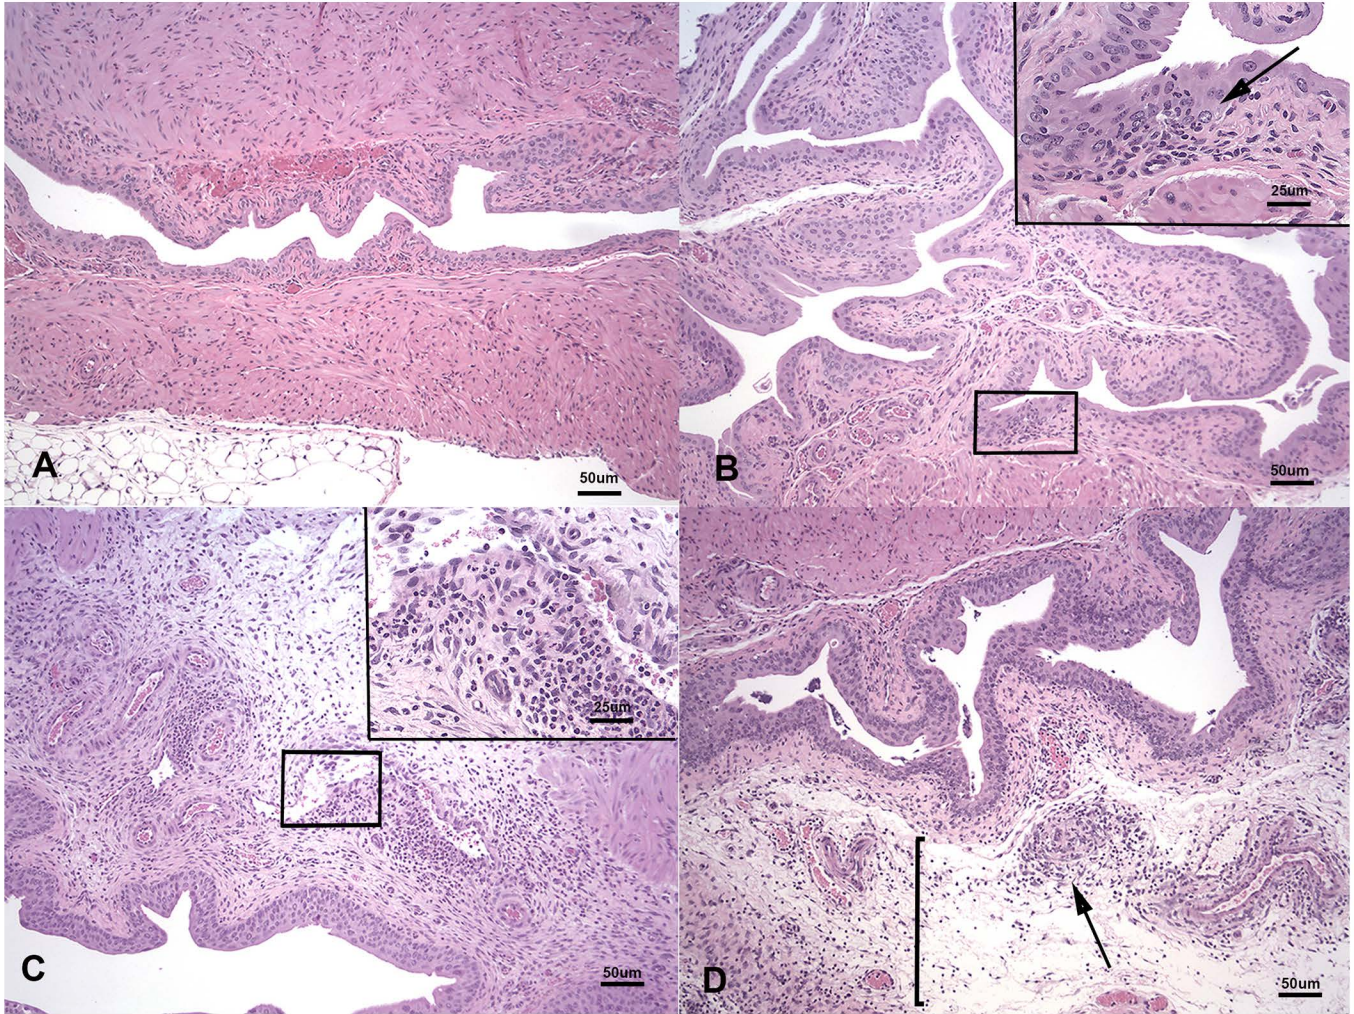

**Fig S2: Representative bladder sections for scoring of cystitis.** (A) Cystitis = 0; normal bladder. (B) Cystitis = 1; scattered neutrophils in submucosa and migrating through mucosa, inset is a higher magnification of boxed region showing neutrophils (arrow). (C) Cystitis = 2; mixed inflammation in the mucosa and submucosa and around vessels, inset is a higher magnification of boxed region indicating neutrophils translocating into the bladder lumen. (D) Cystitis = 3; widespread inflammation, thrombosed vessel (arrow), and marked submucosal edema (bracket).

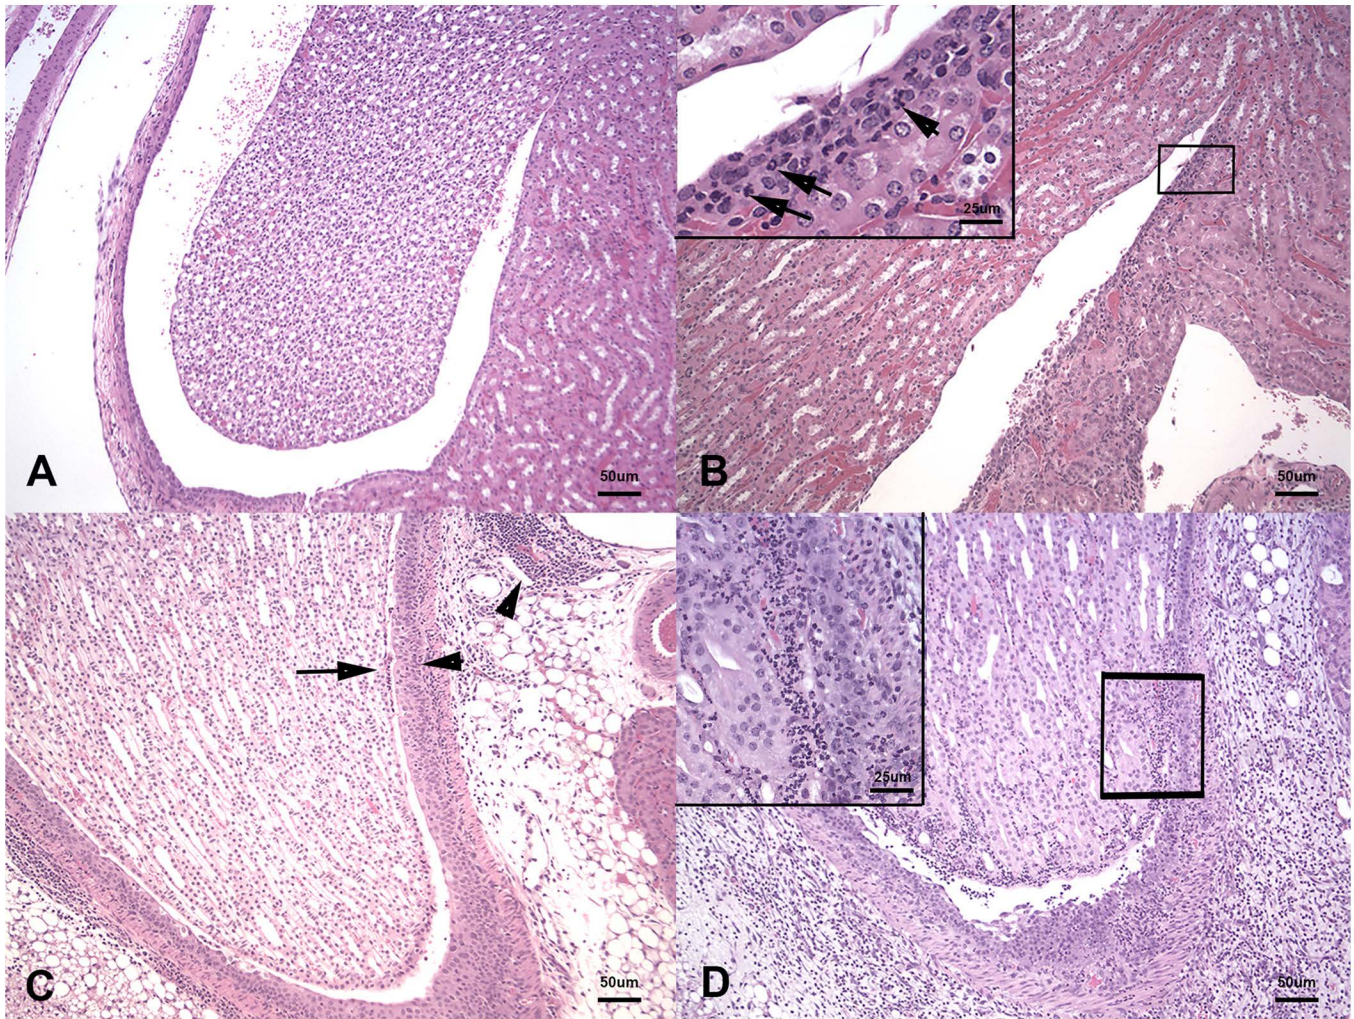

**Fig S3: Representative renal pelvis sections for scoring of pyelonephritis.** (A) Pyelonephritis = 0; normal renal pelvis. (B) Pyelonephritis = 1; scattered neutrophils migrating through pelvic epithelium, inset is a higher magnification of boxed region showing neutrophils (arrows). (C) Pyelonephritis = 2; clustered neutrophils in pelvic lumen (arrow) and inflammation within the epithelium (arrow) and surrounding stroma (arrowheads). (D) Pyelonephritis = 3; many neutrophils in pelvic lumen and within tissue, inset is a higher magnification of boxed region showing neutrophils.

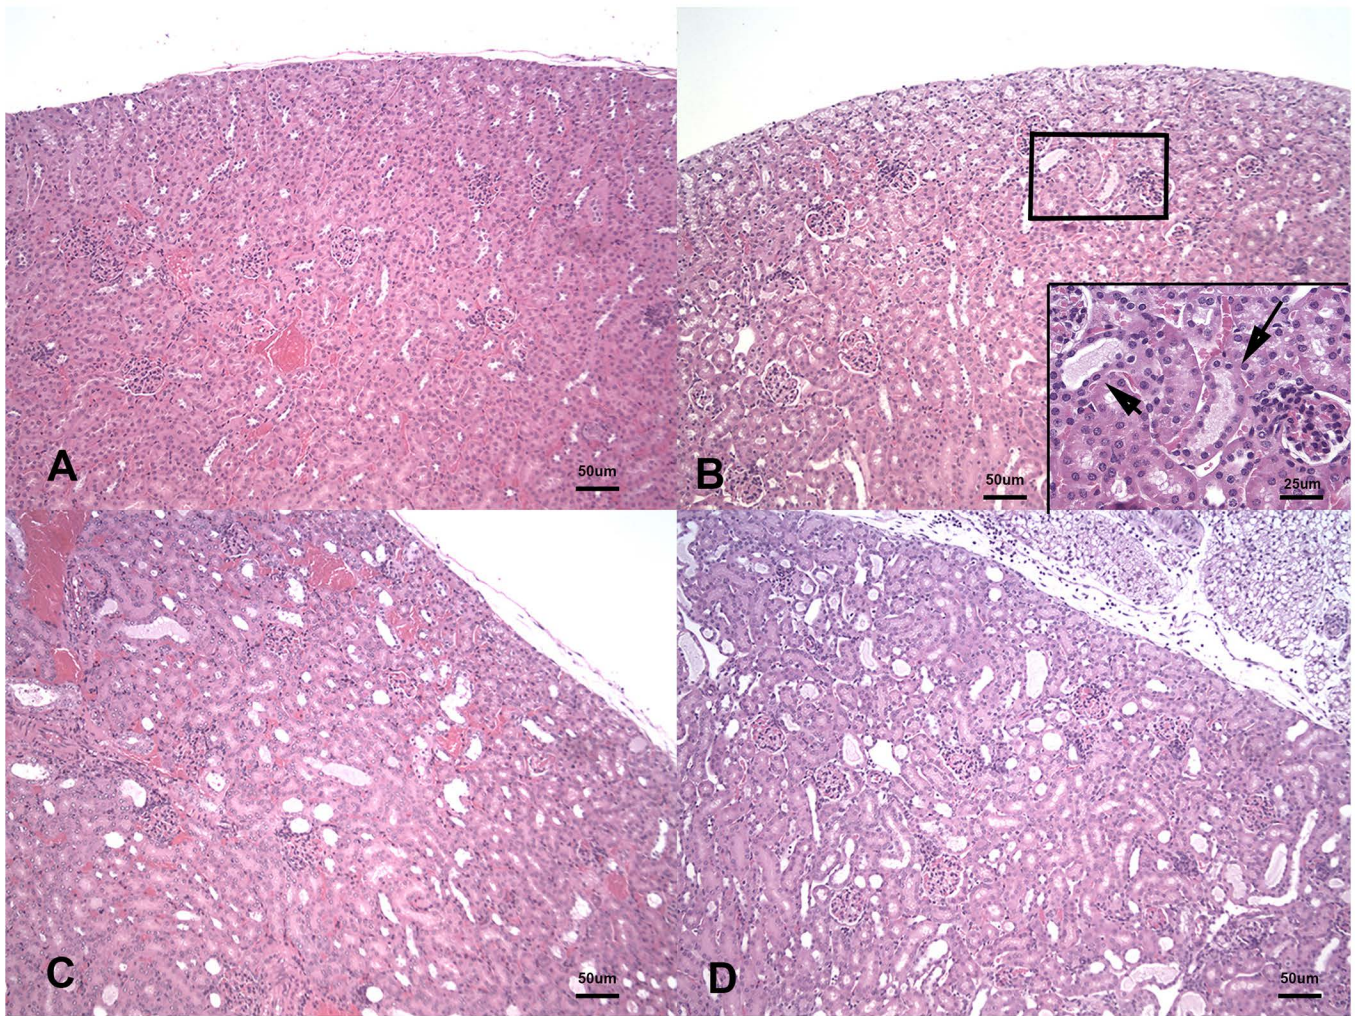

**Fig S4: Representative renal cortex sections for scoring of nephrosis.** (A) Nephrosis = 0; normal cortex. (B) Nephrosis=1; rare dilated tubules with proteinuria, inset is a higher magnification of boxed region showing dilated tubules and proteinuria (arrows). (C) Nephrosis = 2; dilated tubules and proteinuria more prominent. (D) Nephrosis = 3; most of cortex affected, widespread tubular epithelial atrophy and regeneration.

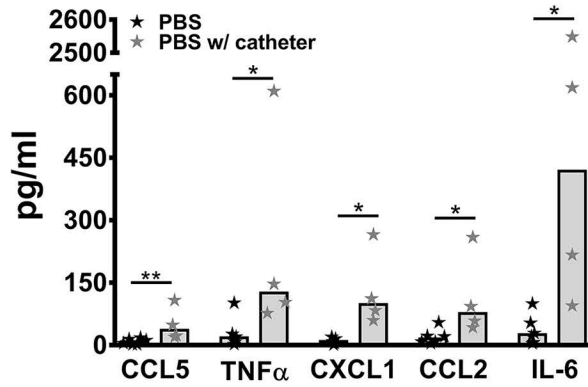

**Fig S5. Experimental CAUTI model induces proinflammatory response.** CBA/J mice were inoculated transurethrally with 50  $\mu$ l of PBS, with or without insertion of a 4 mm segment of sterile silicone catheter tubing. A multiplexed bead-based immunoassay was used on urine samples collected at 24 hpi to quantify cytokines and chemokines. Gray bars representing the median, N=5 mice per infection group. \* $P$ <0.05, \*\* $P$ <0.01, by Student's  $t$ -test.

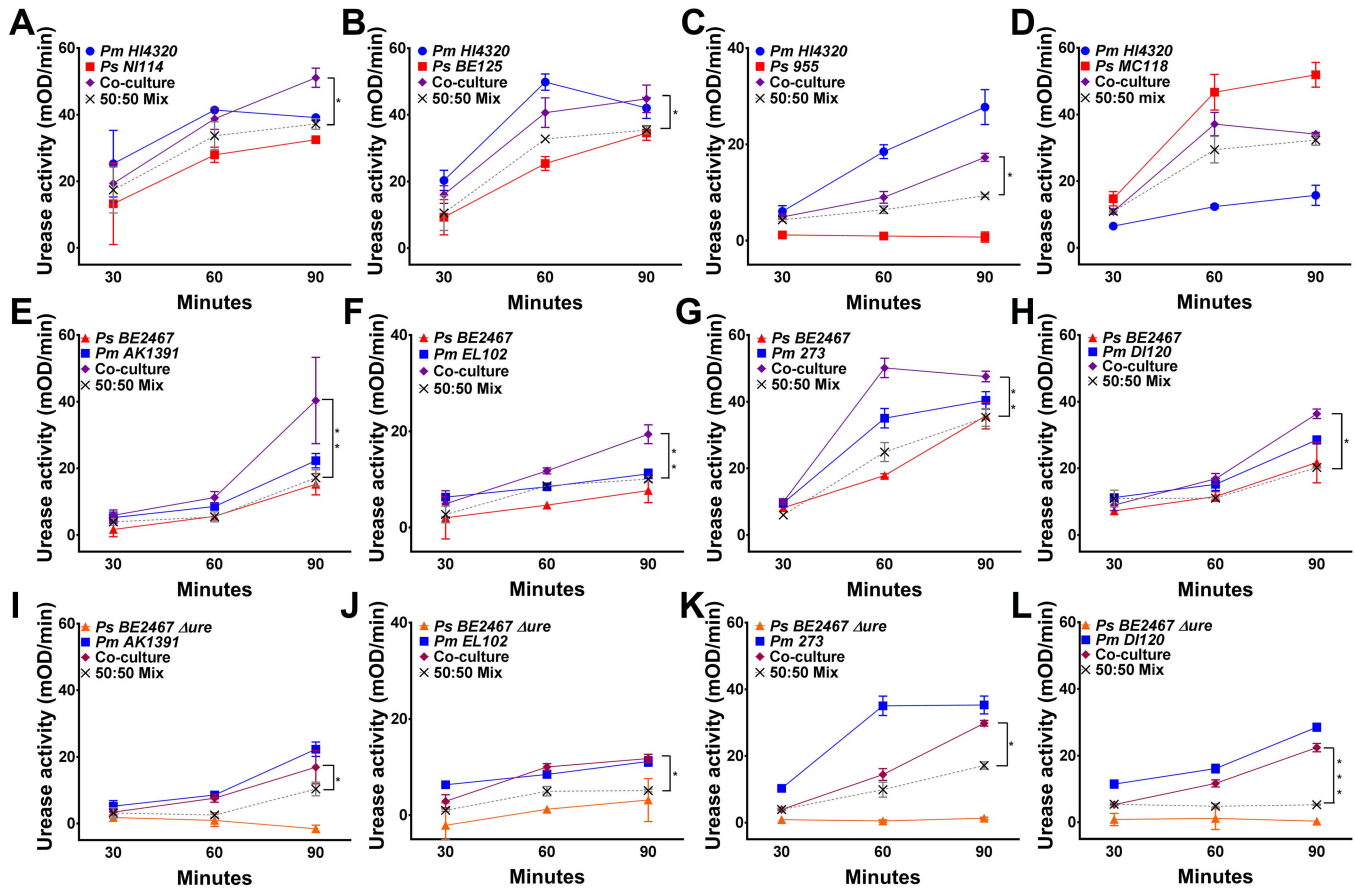

**Fig S6. Enhanced urease activity occurs with numerous *Proteus mirabilis* and *Providencia stuartii* isolates.** (A-D) *P. mirabilis* HI4320, (E-H) *P. stuartii* BE2467, and (I-L) *P. stuartii* BE2467  $\Delta$ ure were cultured for 90 minutes in filter-sterilized human urine individually or co-cultured with other *P. stuartii* (A-D) or *P. mirabilis* (E-L) isolates. Samples were taken at 30-minute intervals to measure urease activity, expressed as the mean optical density per minute (mOD/min) for a 5-minute kinetic read. Urease activity is shown for each isolate and co-culture compared to a 50:50 mixture of single species cultures at each time point. Graphs are representative of at least two independent experiments per strain. Error bars represent mean  $\pm$  SD from at least three technical replicates. \* $P < 0.05$ , \*\* $P < 0.01$ , \*\*\* $P < 0.001$  by two-way ANOVA.

**Supplemental Table 1: Scoring System for Cystitis, Pyelonephritis, and Nephrosis**

|                       | <b>Score</b> |                                                                              |                                                                                 |                                                                           |
|-----------------------|--------------|------------------------------------------------------------------------------|---------------------------------------------------------------------------------|---------------------------------------------------------------------------|
|                       | <b>0</b>     | <b>1</b>                                                                     | <b>2</b>                                                                        | <b>3</b>                                                                  |
| <b>Pyelonephritis</b> | NSL          | Very occasional PMNs                                                         | Rafts of PMNs in the pelvis and/or scattered focal aggregates of PMNs in tissue | Many PMNs in all sections, or a single large focus of PMNs in one section |
| <b>Cystitis</b>       | NSL          | Very rare PMNs in stroma or lumen or occasional perivascular lymphoid cuffs) | Many PMNs and moderate edema                                                    | Many PMNs; widespread, marked edema, transmural inflammation              |
| <b>Nephrosis</b>      | NSL          | Rare dilated tubules with epithelial loss or regeneration                    | Affected tubules in many fields, easily identified                              | Most fields affected                                                      |

NSL = no significant lesions; PMNs = polymorphonuclear leukocytes (neutrophils)



**Supplemental Table 2: Enhanced Urease Activity During Co-culture of *P. mirabilis* and *P. stuartii* Isolates.**

|                          | <i>Providencia stuartii</i> |                       |        |        |        |
|--------------------------|-----------------------------|-----------------------|--------|--------|--------|
| <i>Proteus mirabilis</i> | BE2467                      | BE2467<br><i>Δure</i> | 955    | NI114  | MC118  |
| HI4320                   | 0.0016                      | 0.0001                | 0.0230 | 0.0092 | 0.1649 |
| HI4320 <i>Δure</i>       | 0.0593                      | 0.5924                | 0.2579 | 0.3529 | 0.2408 |
| DI120                    | 0.0093                      | 0.0003                | 0.0084 | 0.0337 | 0.6962 |
| HU1069                   | 0.0255                      | 0.0074                | 0.0242 | 0.0001 | 0.0316 |
| EL102                    | 0.0068                      | 0.0105                | 0.0010 | 0.0202 | 0.9022 |
| AK1391                   | 0.0077                      | 0.0112                | 0.3573 | 0.0050 | 0.2533 |
| 273                      | 0.0113                      | 0.0289                | 0.0001 | 0.0443 | 0.6494 |

Green shading indicates combinations in which urease activity was significantly enhanced by co-culture compared to a 50:50 mixture of single species cultures at each time point. Blue shading indicates combinations in which co-culture did not significantly enhance urease activity.

Numerical values indicate representative *P* values, by two-way ANOVA, from at least two independent experiments with four technical replicates for each strain.
